# Supplementary material for: Radioembolization-Induced Changes in Hepatic [18F]FDG Metabolism in Non-Tumorous Liver Parenchyma
Source: MDPI journal article supplement (doi:10.3390/diagnostics12102518), 2022-10-17
Supplement: s1 [file s1]

**Supplementary Table S1.** PERCIST criteria.

|                                  | PERCIST                                                                                                                                                                                                                                                                                                |
|----------------------------------|--------------------------------------------------------------------------------------------------------------------------------------------------------------------------------------------------------------------------------------------------------------------------------------------------------|
| <b>Main criteria</b>             |                                                                                                                                                                                                                                                                                                        |
| Patient preparations             | 4-6 hours fasting                                                                                                                                                                                                                                                                                      |
| Serum glucose level              | < 200 mg/dl (<11,1 mmol/l)                                                                                                                                                                                                                                                                             |
| Injected activity                | Center dependent, but within 20% difference between scans                                                                                                                                                                                                                                              |
| Measurement unit                 | 1. $SUV_{LBM} = SUL$<br>2. $SUL_{peak} = 1 \text{ cm}^3 \text{ VOI}$                                                                                                                                                                                                                                   |
| Glucose correction               | No                                                                                                                                                                                                                                                                                                     |
| Timing restrictions              | PET at least 10 days after last chemotherapy<br>8-12 weeks after external beam radiotherapy                                                                                                                                                                                                            |
| Scan restrictions                | >50 minutes p.i.<br>< 15 min difference in p.i. times between studies. ( <i>but always &gt; 50 min p.i.</i> )                                                                                                                                                                                          |
|                                  | <b>Normal liver SUL must be within 20% (and &lt; 0,3 SUL units) between baseline and follow-up scans</b>                                                                                                                                                                                               |
|                                  | Always same scanner, same model, same reconstructions                                                                                                                                                                                                                                                  |
| Partial volume correction        | No                                                                                                                                                                                                                                                                                                     |
| Correlation with other tissues * | 3 cm diameter VOI in right liver lobe, expressed in $SUL_{mean} + SD$ .<br>If liver is affected or VOI cannot be placed: 1 cm diameter axial (ROI) with 2 cm diameter in z-axis (= ellipse VOI)                                                                                                        |
| <b>Measurements</b>              |                                                                                                                                                                                                                                                                                                        |
| Tumor                            | $SUL_{peak}$ VOI centered around hottest point in tumor foci (around maximum SUL pixel; which also should be noted)<br>Most intense hypermetabolic tumors                                                                                                                                              |
| Number of lesions                | Up to 5 lesions (up to 2 per organ)<br>2 cm in diameter (though smaller lesions with sufficient uptake might be included).<br>Baseline tumor uptake: $> 1,5 \times SUL_{mean,liver} + 2 \text{ SDs } SUL_{mean,liver}$<br>Or $> 2 \times SUL_{mean,bloodpool} + 2 \text{ SDs } SUL_{mean,mediastinum}$ |
| Follow up measurements           | Most intense lesions, not necessarily the same lesions                                                                                                                                                                                                                                                 |
| Additional parameters            |                                                                                                                                                                                                                                                                                                        |

**Definition response:**

|                               |                                                                                                                                          |
|-------------------------------|------------------------------------------------------------------------------------------------------------------------------------------|
| Calculation                   | Sum of PERCIST lesions                                                                                                                   |
| Complete metabolic response   | Visual disappearance of all metabolic active tumors                                                                                      |
| Partial metabolic response    | >30% reduction and at least 0,8 unit decline in SUL <sub>peak</sub>                                                                      |
| Stable disease                | Between partial response and progressive disease                                                                                         |
| Progressive metabolic disease | >30% increase and at least 0,8 unit increase in SUL <sub>peak</sub> <i>or</i> new metabolic active tumors <i>or</i> >75% increase in TLG |

*Legend: SUV = standardized uptake value, LBM = lean body mass, SUL = SUV corrected for lean body mass, p.i. = post-injection, SD = Standard deviation, TLG = total lesion glycolysis*

*\* modified PERCIST 1.0: threshold for minimal metabolically measurable tumor activity is 1.5 x mean liver SUL instead of 1.5 x mean liver SUL + 2 SDs (as in the conventional PERCIST)*
